# Supplementary material for: An optimistic future of C4 crop broomcorn millet (Panicum miliaceum L.) for food security under increasing atmospheric CO2 concentrations
Source: PeerJ. 2022 Sep 7;10:e14024. doi: 10.7717/peerj.14024 (PMC9463996; doi:10.7717/peerj.14024)
Supplement: Supplemental Information 1 [file peerj-10-14024-s001.xlsx]

## Sheet: Yield
			grain weight
	2015	1-M-E-W-1	320.833
	CK	1-M-E-W-2	313.833
		1-M-E-W-3	351.208
		1-M-W-W-1	388.25
		1-M-W-W-2	345.542
		1-M-W-W-3	326.833
			341.083
			11.1097
	EC	2-M-W-W-1	425.458
		2-M-W-W-2	424.042
		2-M-W-W-3	401.458
		2-M-E-W-1	368.625
		2-M-E-W-2	403.042
		2-M-E-W-3	421.458
			407.347
			8.86654
	2016	1-M-W-2	397.759
	CK	1-M-W-4	475.09
		1-M-W-1	449.682
		1-M-W-6	376.278
		1-M-W-3	358.249
		1-M-W-8	468.76
			420.969
			20.4184
	EC	2-M-W-5	432.306
		2-M-W-8	477.057
		2-M-W-1	565.611
		2-M-W-4	583.58
		2-M-W-3	613.563
		2-M-W-6	610.663
			547.13
			30.6673

## Sheet: oil starch and protein
			concentaton
				%					accumulation（g/m2）
			protein	starch	oil				protein	starch	oil
2013	CK	1-1	0.14707	0.5978	0.0331		2013	CK	38.1279	154.98	8.58117
		1-2	0.12705	0.6276	0.0295				34.015	168.027	7.89801
		1-3	0.12166	0.6187	0.0365				33.1397	168.531	9.94245
	EC	2-3	0.119	0.536872	0.0519974			EC	36.8726	166.352	16.1116
		2-2	0.11187	0.551	0.044				31.7687	156.473	12.4951
		2-1	0.09856	0.5568	0.0464				31.0053	175.16	14.5967
2015	CK	13-2015-1-M-W-W-2-1.0	0.14195	0.696154	0.029		2015	CK	48.2462	237.42	9.89142
		13-2015-1-M-W-W-2-2.0	0.14095	0.696	0.047				53.284	232.89	16.0309
		14-2015-1-M-E-W-2-1.0	0.15662	0.681264	0.027				49.4127	235.061	9.20925
		14-2015-1-M-E-W-2-2.0	0.15582	0.684326				EC	57.7313	283.052	12.2204
		15-2015-1-M-W-W-3-1.0	0.14401	0.689165					56.2078	281.414	11.4057
		15-2015-1-M-W-W-3-2.0	0.14573	0.689155					56.7211	281.461	12.2204
	EC	16-2015-2-M-E-W-1-1.0	0.14306	0.692707	0.03		2016	CK	63.6281	288.584	12.2082
		16-2015-2-M-E-W-1-2.0	0.14039	0.697027	0.028				67.4147	287.586	12.2082
		17-2015-2-M-W-W-2-1.0	0.13696	0.689866	0.03				65.7035	287.633	12.6292
		17-2015-2-M-W-W-2-2.0	0.13901	0.691824				EC	83.3618	373.942	14.7727
		18-2015-2-M-E-W-2-1.0	0.13892	0.691661					82.7818	372.97	14.7727
		18-2015-2-M-R-W-2-2.0	0.13957	0.690259					82.9131	372.902	14.7727
2016	CK	19-2016-1-W-1-1.0	0.15101	0.686909	0.029
		19-2016-1-W-1-2.0	0.15128	0.684125	0.029
		20-2016-1-W-2-1.0	0.16087	0.682387	0.03
		20-2016-1-W-2-2.0	0.15941	0.683904
		19-2016-1-W-1-2.0	0.15128	0.684125
		20-2016-1-W-2-1.0	0.16087	0.682387
	EC	21-2016-2-W-1-1.0	0.15068	0.685651	0.027
		21-2016-2-W-1-2.0	0.15404	0.681254	0.027
		22-2016-2-W-2-1.0	0.15071	0.681792	0.027
		22-2016-2-W-2-2.0	0.15189	0.681562
		23-2016-2-W-3-1.0	0.15147	0.683213
		23-2016-2-W-3-2.0	0.15161	0.679891

## Sheet: Nutrient
			concentration											accumulation（g/m2）
		TN g/kg	TP g/kg	TK g/kg	Fe(mg/kg)	Mn(mg/kg)	Ca(mg/kg)	Mg(mg/kg)	Cu(mg/kg)	Zn(mg/kg)	B(mg/kg)		TN g	TP g	TK g	Fe mg	Mn（mg）	Ca(mg)	Mg(mg)	Cu(mg)	Zn(mg)	B(mg)
CK	2013-19	23.5312	2.88652	2.17779	122.4	7.15	37.2	664	8.5	57.7	4.2		6.10046	0.748332	0.564593	31.7322	1.85364	9.6441	172.142	2.20363	14.9587	1.08885
	20	20.328	2.39007	2.11766	129.45	7	34.55	670.5	12.05	6.75	6.65		5.4424	0.639892	0.566958	34.6575	1.8741	9.25004	179.512	3.22614	1.80717	1.7804
	21	19.4656	2.4078	1.99738	135.9	7.4	37.2	613	10.15	58.1	5		5.30235	0.655875	0.544079	37.0186	2.01573	10.1331	166.979	2.76482	15.8262	1.36198
EC	22	19.04	2.6383	2.68895	136.1	8.65	32.25	906	15.75	55.4	5.5		5.89962	0.817488	0.833181	42.1712	2.68024	9.9928	280.728	4.8802	17.1659	1.7042
	23	17.8992	2.97518	3.32037	142	12.2	37	1599	15.75	61.65	5.3		5.083	0.844888	0.942917	40.325	3.46455	10.5072	454.083	4.47267	17.5073	1.50509
	24	15.7696	2.46099	2.53861	133.9	9.65	36.15	1039.5	9.6	57.6	5.85		4.96085	0.774187	0.798604	42.1227	3.03573	11.3722	327.009	3.02	18.12	1.84031
CK	2015-25	22.632	2.4078	2.68895	83.9	8.8	33.35	1267	5.85	47.65	4.2		7.7194	0.821261	0.917155	28.6169	3.00153	11.3751	432.153	1.99534	16.2526	1.43255
	26	24.9952	2.42553	2.47847	99.15	8.45	32.05	1163.5	6.7	45.9	5.75		8.52545	0.827309	0.845365	33.8184	2.88215	10.9317	396.85	2.28526	15.6557	1.96123
	27	23.1792	2.33688	2.59874	91.525	8.625	32.7	1215.25	6.275	46.775	4.975		7.90604	0.797071	0.886388	31.2177	2.94184	11.1534	414.502	2.1403	15.9542	1.69689
EC	28	22.676	2.53191	2.38827	110.1	9	35.2	1206	6.6	47.7	6.2		9.23701	1.03137	0.972854	44.8489	3.66612	14.3386	491.261	2.68849	19.4305	2.52555
	29	22.0776	2.33688	2.14772	129.95	9.05	32	1152.5	10.65	49.7	7		8.99325	0.951921	0.874869	52.9348	3.68649	13.0351	469.468	4.33825	20.2452	2.85143
	30	22.2792	2.31915	2.71901	115.2	9.7	37.85	1373	7.9	51.45	6.15		9.07537	0.944699	1.10758	46.9264	3.95127	15.4181	559.288	3.21804	20.958	2.50519
CK	2016-31	24.1832	2.24823	2.38827	124.55	9.4	30.65	1175.5	10.2	58.65	4.55		10.1805	0.946444	1.0054	52.4323	3.95715	12.9028	494.854	4.29393	24.6901	1.91543
	32	25.6224	2.44326	2.62881	127.15	10.35	38.05	1188	9.05	61	4.85		10.7864	1.02855	1.10666	53.5268	4.35708	16.018	500.117	3.80981	25.6794	2.04172
	33	24.972	2.44326	2.59874	125.85	9.8	30.15	1165.5	23	57.55	3.05		10.5126	1.02855	1.094	52.9795	4.12554	12.6924	490.645	9.68239	24.227	1.28397
EC	34	24.3776	2.4078	2.47847	97.15	10.5	34.7	1231	9.8	62.9	5.2		13.3379	1.3174	1.35606	53.1543	5.74494	18.9856	673.525	5.36194	34.4149	2.84511
	35	24.208	2.58511	2.32813	86.7	9.45	32.9	1085.5	8.45	59	5.65		13.2451	1.41441	1.27381	47.4368	5.17044	18.0008	593.917	4.62331	32.2811	3.09132
	36	24.2464	2.30142	2.3582	100.85	10.05	31.35	1131	9.85	61.05	5.55		13.2661	1.25919	1.29026	55.1787	5.49872	17.1527	618.812	5.3893	33.4027	3.03661
